# Supplementary material
Source: PubMed Central journal article supplement (PMC6294442)
Supplement: NIHMS994560-supplement-Supplemental.pdf [file NIHMS994560-supplement-Supplemental.pdf]

Dual HDAC and PI3K inhibition abrogates NF $\kappa$ B- and FOXM1-mediated DNA damage response to radiosensitize pediatric high-grade gliomas

Sharmistha Pal, David Kozono, Xiaodong Yang, Wojciech Fendler, Whitney Fitts, Jing Ni, John A. Alberta, Jean Zhao, Kevin X. Liu, Jie Bian, Nathalie Truffaux, William A. Weiss, Adam C. Resnick, Pratiti Bandopadhyay, Keith L. Ligon, Steven G. DuBois, Sabine Mueller, Dipanjan Chowdhury, Daphne A. Haas-Kogan

Supplemental Figure:

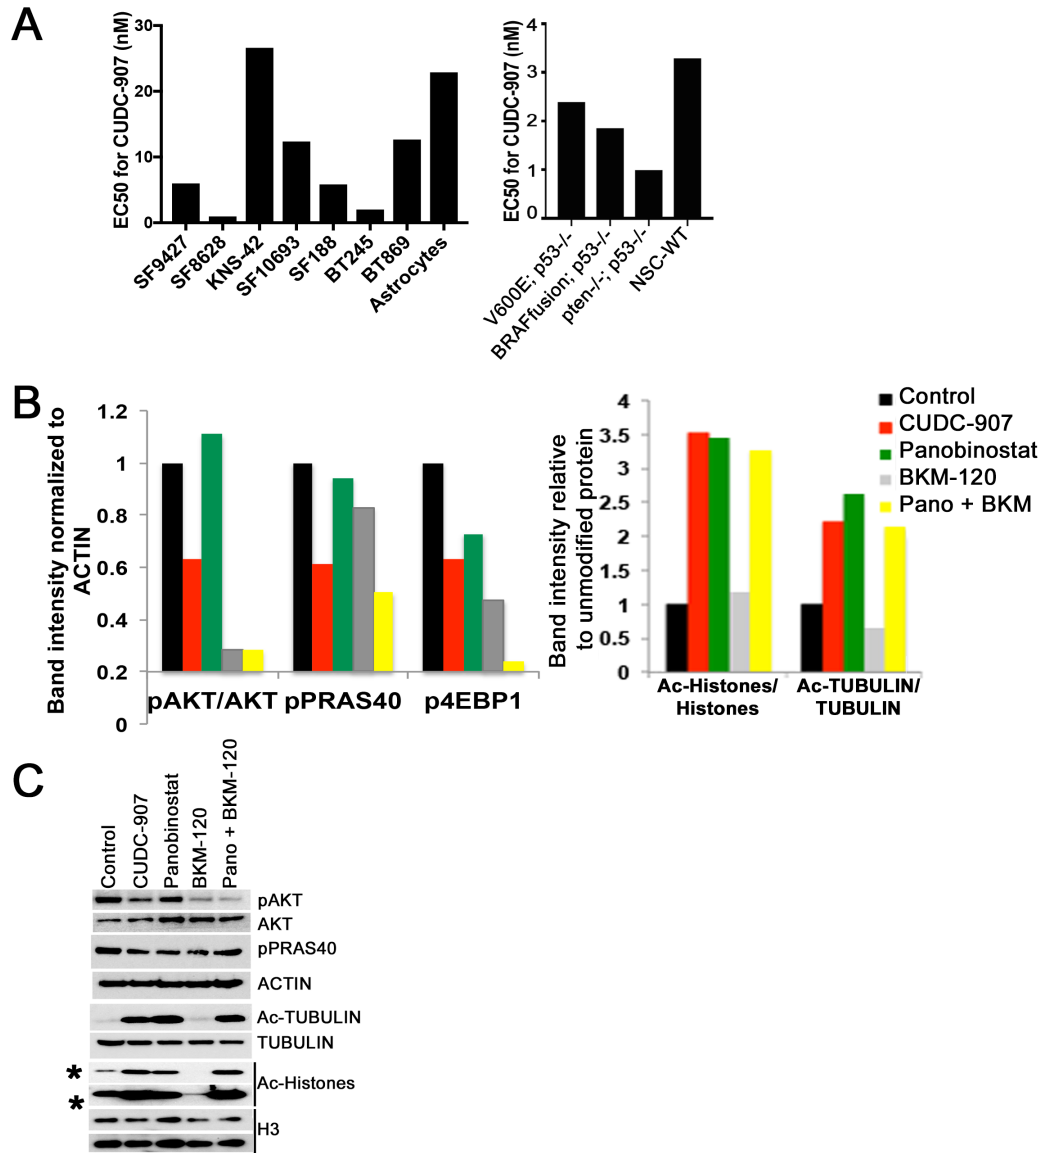

**Supplementary Figure S1. CUDC-907 successfully inhibits HDAC and PI3K signaling, and exhibits single agent activity and synergism with radiation against pHGG and DIPG. (A)** CUDC-907 concentrations required for 50% cell growth inhibition ( $EC_{50}$ ) in glioma lines, normal human astrocytes, and normal mouse neural stem cells (NSC) as determined by PRISM using the data presented in Figure 1A and B. **(B)** ImageJ based quantification of Western blots in SF188 cells shown in Figure 1C. **(C)** Western blots analysis of SF8628 cells after CUDC-907 (100 nM), panobinostat (100 nM), or BKM120 (300 nM) or panobinostat (100 nM) plus BKM120 (300 nM) combination for either 2 hours for AKT, p-AKT, and acetylated proteins, or 16 hours for p-PRAS40. \* indicates a shorter exposure time for the blot.

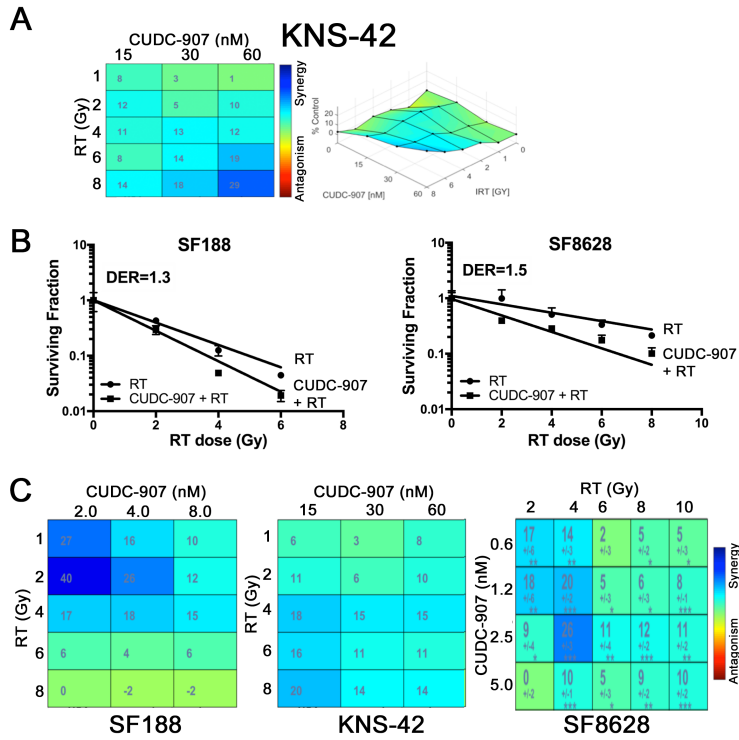

**Supplementary Figure S2. CUDC-907 exhibits synergism with radiation against pHGG and DIPG.** (A) KNS-42 cells treated with CUDC-907 at the indicated doses for 16 hours followed by irradiation; cell viability was measured 72 hours after CUDC-907 addition. Combenefit software analysis demonstrates synergism of CUDC-907 and radiation as indicated by the presence of blue-green. (B) Colonogenic cell survival assays were performed in triplicates and cells were treated with CUDC-907 (2 nM) for 16 hours prior to irradiation at various doses. Cells were allowed to form colonies (>50 cells) and stained with 0.1% crystal violet. Colonies were counted and surviving fractions are plotted. Data represent mean  $\pm$  SEM. Dose enhancement ratios (DER) are calculated at 10% survival. (C) Synergistic cytotoxicity of CUDC-907 and radiation administered concurrently in SF188, KNS-42 and SF8628 cell lines. Cell viability was measured 72 hours after concurrent treatment and Combenefit software was used to analyze synergy-antagonism relationships.

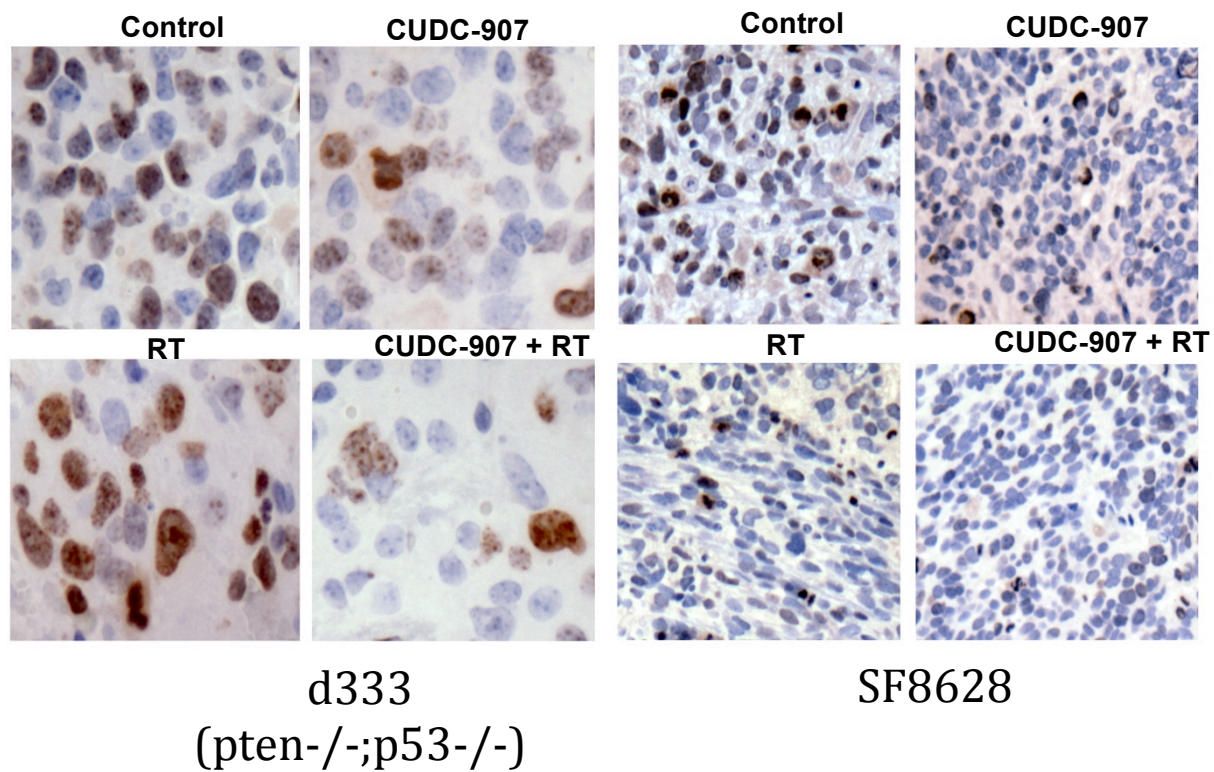

**Supplementary Figure S3. Cell proliferation is reduced *in vivo* by CUDC-907 or irradiation (RT), with greater reduction after combination therapy compared to either single modality. Representative images of Ki-67 immunohistochemical staining of d333 (*pten*<sup>-/-</sup>;*p53*<sup>-/-</sup>) and SF8628 orthotopic tumors (quantification presented in Fig. 1F).**

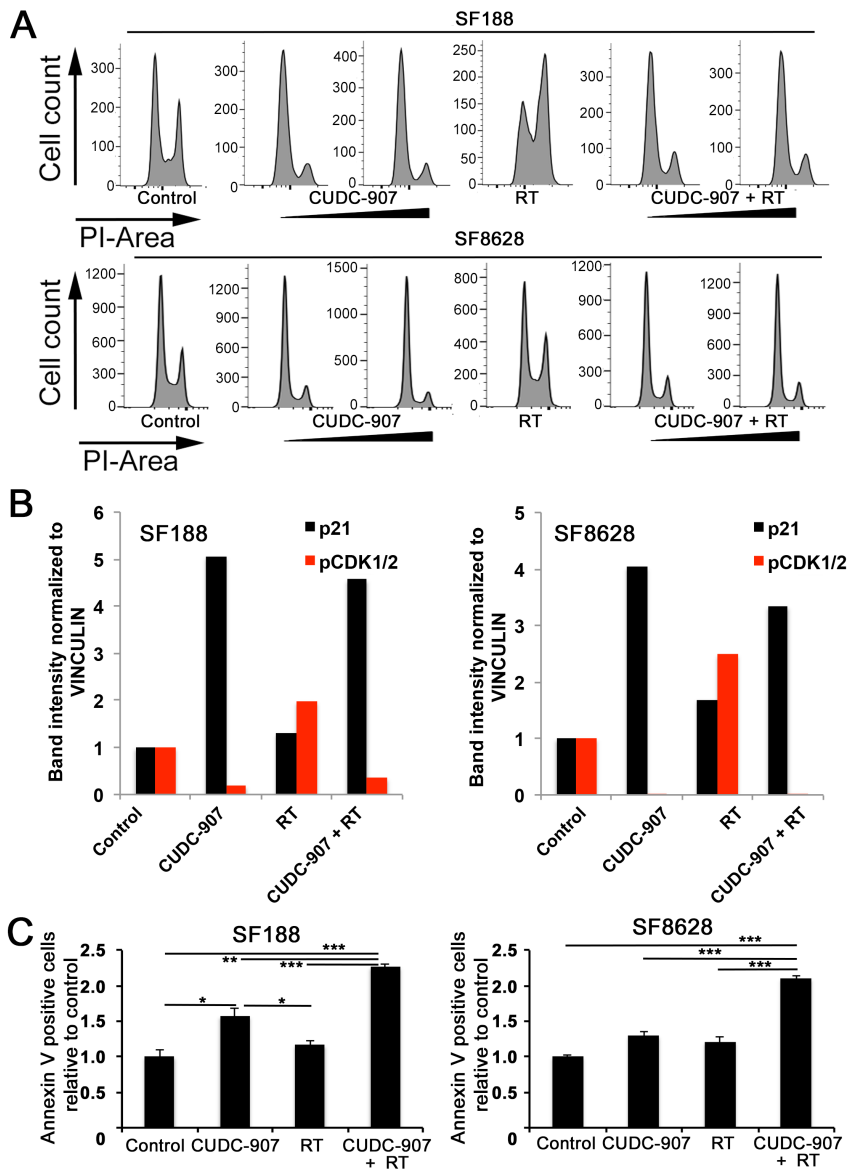

**Supplementary Figure S4. CUDC-907 induces G1 cell cycle arrest and synergizes with radiation to induce apoptosis and alter cell cycle proteins.** (A) Histograms representing the cell cycle profiles for the data presented in Figure 2A. (B) Quantitation of western blots shown in Fig. 2B using ImageJ software show induction of p21 and reduced phosphorylation of CDK1/2 in the presence of CUDC-907. (C) Apoptosis quantitated by Annexin V staining of SF188 and SF8628 following CUDC-907 (100 nM), radiation (4 Gy), or CUDC-907 followed 16 hours later by radiation. Annexin V positive cells were quantitated by flow cytometry, 4 hours after irradiation or 20 hours after CUDC-907 treatment. Statistical analyses with  $p < 0.05$  are indicated by \* $p < 0.05$ , \*\* $p < 0.01$ , \*\*\* $p < 0.001$ , \*\*\*\* $p < 0.0001$ .

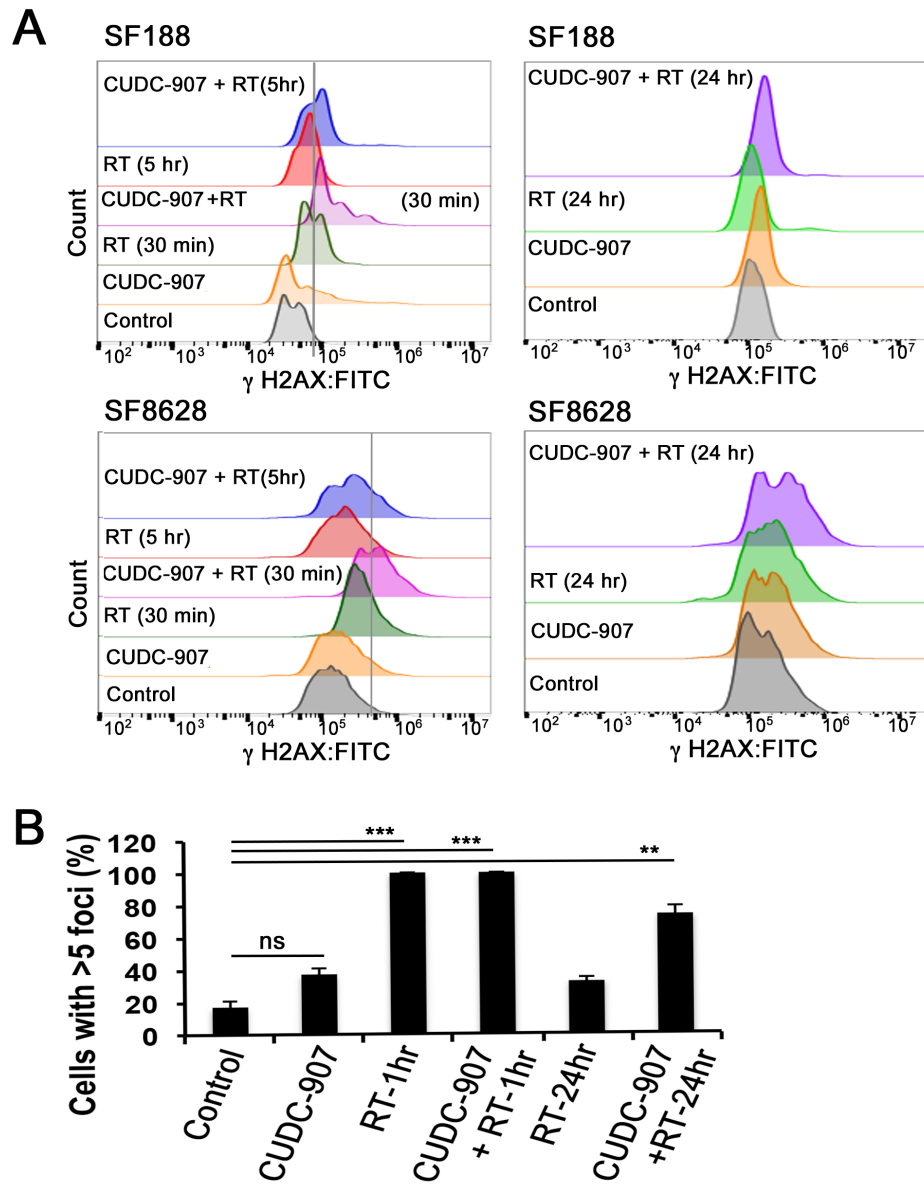

**Supplementary Figure S5. CUDC-907 synergizes with radiation to induce DNA double strand breaks and delay DNA damage repair.** (A) Flow cytometry histograms of anti- $\gamma$ -H2AX staining following CUDC-907 (100 nM), radiation (4 Gy), or combination therapy, with quantitation presented in Figure 2D. Cells were fixed and stained 30 min, 5 hours, and 24 hours after radiation treatment. The 24-hour post-radiation time-point is compared to CUDC-907 treated cells that were grown under similar conditions without radiation exposure. (B)  $\gamma$ -H2AX foci visualized by immunofluorescence staining in SF188 cells treated with CUDC-907 (100 nM), radiation (4 Gy) or combination (CUDC-907 followed 16 hours later by radiation). A cell was considered positive if it contained  $\geq 5$  foci and at least 100 cells were imaged and counted per condition. All values are mean  $\pm$  SEM and significant p values are shown as \* $p < 0.05$ , \*\* $p < 0.01$ , \*\*\* $p < 0.001$ , \*\*\*\* $p < 0.0001$ .

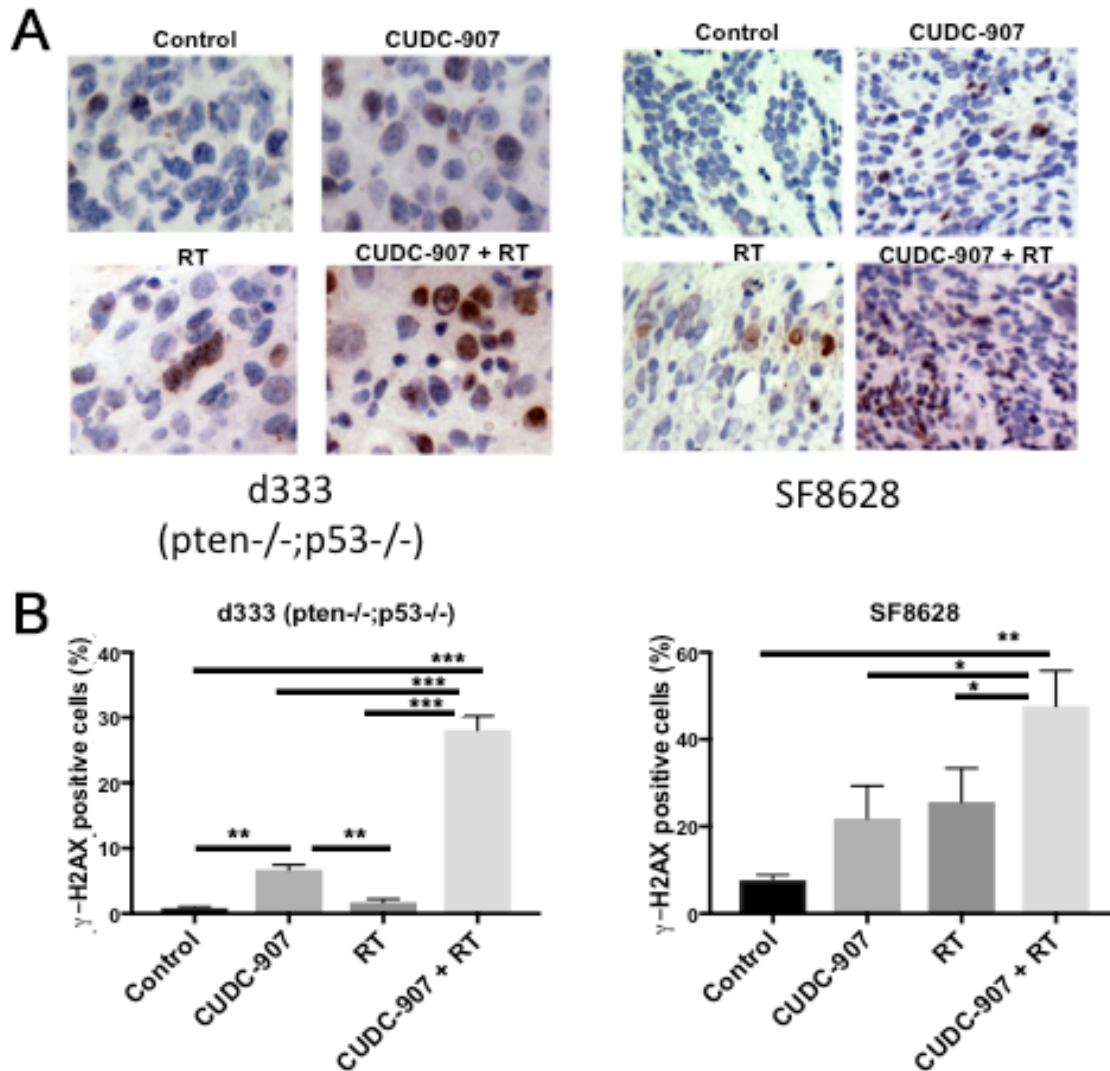

**Supplementary Figure S6. CUDC-907 enhances radiation-induced DNA double strand breaks *in vivo*.**  $\gamma$ -H2AX immunohistochemical staining of d333 murine gliomas and SF8628 DIPG model treated *in vivo* with CUDC-907 (100 mg/kg daily M-F), radiation (0.5 Gy M-W-F) or combination [CUDC-907 (100 mg/kg) following by radiation (0.5 Gy)]. The same murine brain sections were also stained for Ki-67 (data shown in Fig. 1F). (A) Representative images of  $\gamma$ -H2AX staining; (B) quantification of  $\gamma$ -H2AX IHC positive cells using Cell Profiler. Graph represents mean  $\pm$  SEM and significant p values are indicated as \* $p < 0.05$ , \*\* $p < 0.01$ , \*\*\* $p < 0.001$ , \*\*\*\* $p < 0.0001$ .



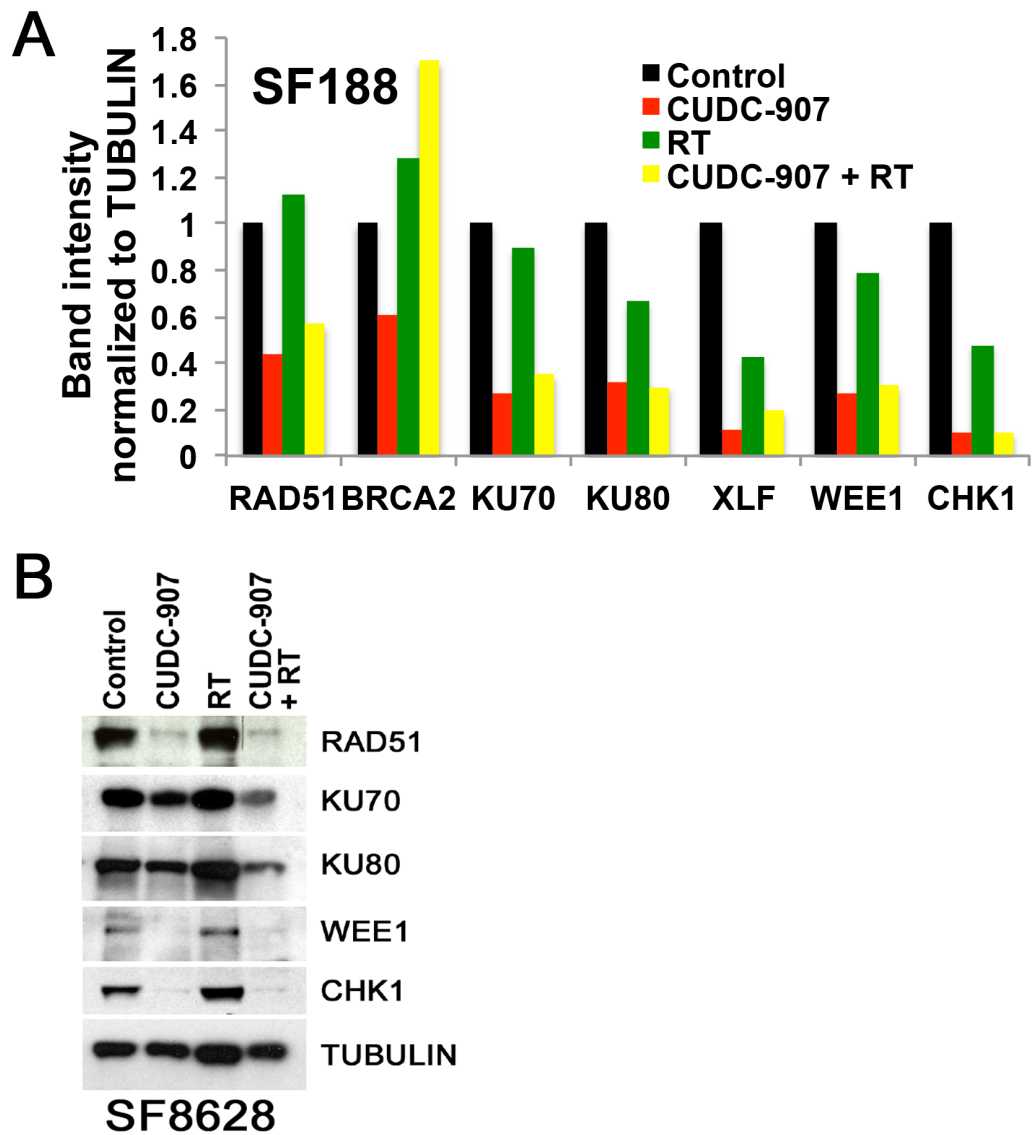

**Supplementary Figure S7. CUDC-907 reduces expression of DNA damage response proteins.** (A) Image J based quantitation of Western blots shown in Fig. 3E demonstrating reduced expression of HR, end joining, and checkpoint kinases after CUDC-907 treatment. (B) Western blot analyses following treatment of SF8628 DIPG cells with DMSO, CUDC-907 (100 nM), radiation (4 Gy) or combination (CUDC-907 followed 16 hours later by radiation).



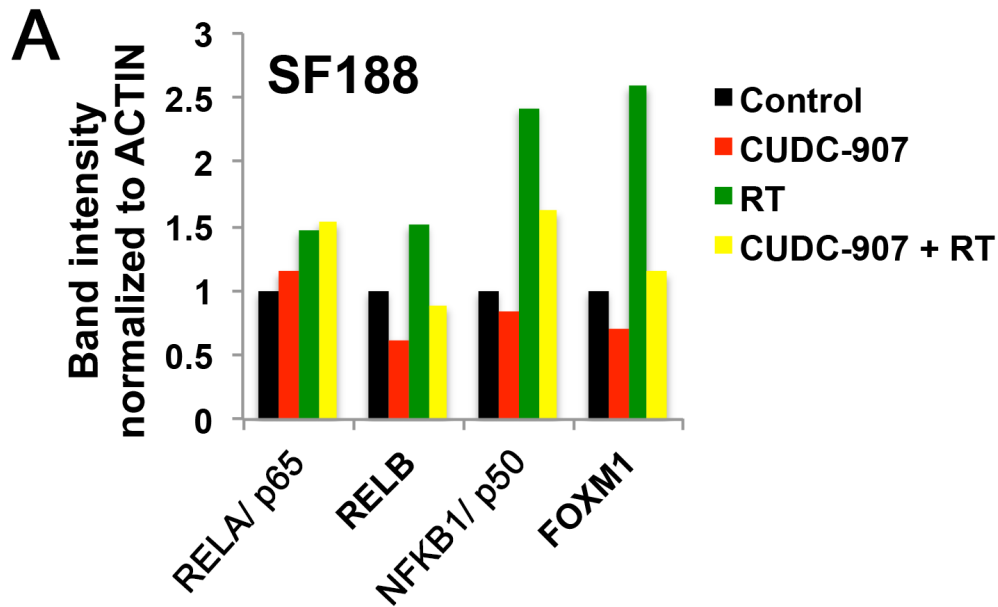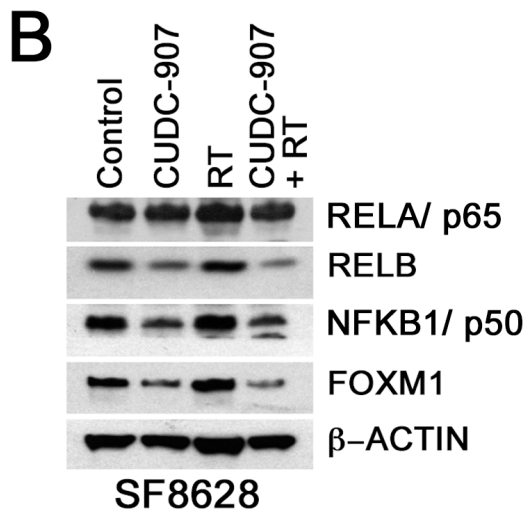

**Supplementary Figure S8. CUDC-907 reduces expression of transcription factors, NF $\kappa$ B and FOXM1.** (A) Western blot in Figure 4B is quantitated and graphs demonstrate reduced expression of p50/NFKB1, RELB and FOXM1 after CUDC-907 treatment and ablation of their upregulation by radiation when pretreated with CUDC-907. (B) Western blot analyses of the NF $\kappa$ B and FOXM1 proteins following treatment of SF8628 DIPG cells with DMSO, CUDC-907 (100 nM), radiation (4 Gy) or combination (CUDC-907 followed 16 hours later by radiation).

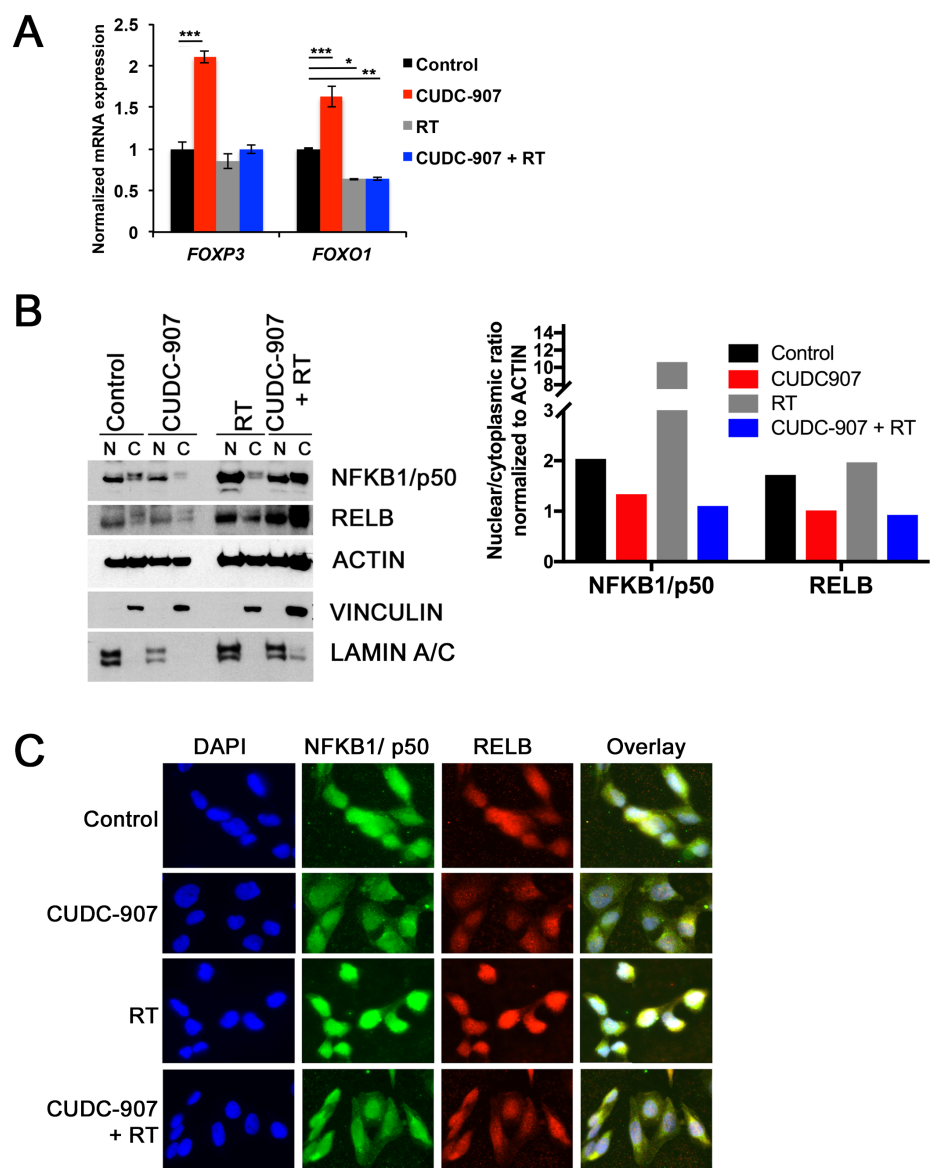

**Supplementary Figure S9. CUDC-907 enhances forkhead genes, *FOXO1* and *FOXP3*, expression and impairs nuclear localization of NFKB1/p50 and RELB.** (A) mRNA expression of two forkhead proteins, *FOXO1* and *FOXP3*, analyzed by RT-qPCR following the indicated treatments, as in Fig. 4A. Significant p values are indicated as \* $p < 0.05$ , \*\* $p < 0.01$ , \*\*\* $p < 0.001$ , \*\*\*\* $p < 0.0001$  (B and C) Western blot analysis of nuclear (N) and cytoplasmic (C) fractions and immunofluorescence staining for NFKB1/p50 and RELB in SF188 cells treated with CUDC-907 (100 nM), radiation (4 Gy) or combination (CUDC-907 followed 16 hours later by radiation). Western blots were quantitated using Image J software and the ratio of nuclear to cytoplasmic protein was determined after ACTIN normalization. VINCULIN and LAMIN A/C expression in cytoplasmic and nuclear fractions, respectively, demonstrate successful nuclear and cytoplasmic separation. For immunostaining, cells were fixed 1 hour after treatment and DAPI was used for nuclear counterstaining.

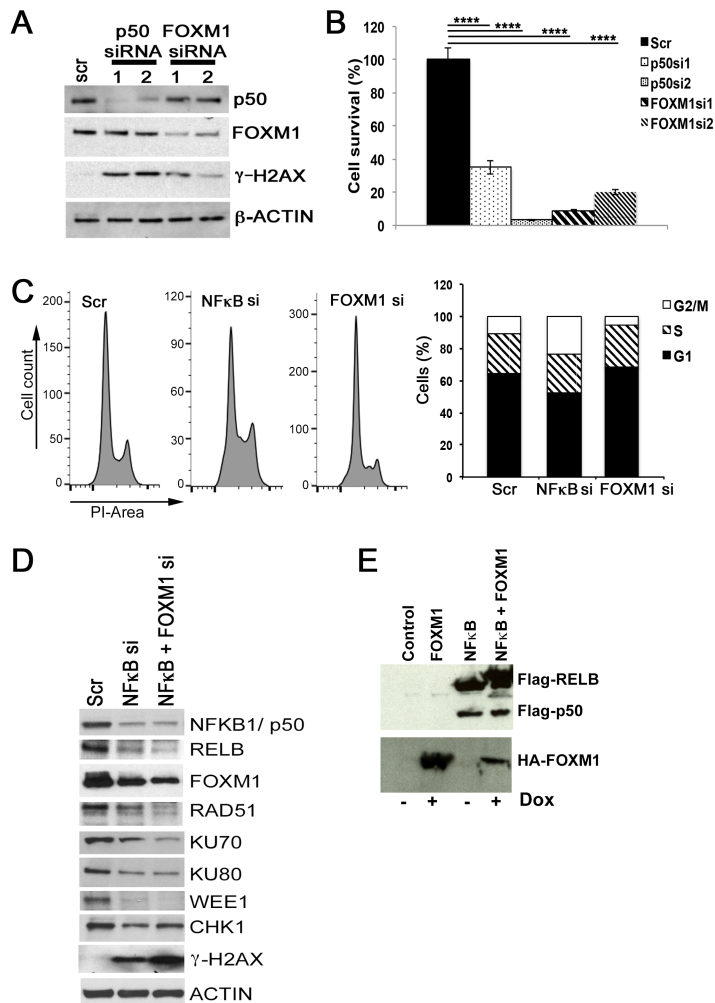

**Supplementary Figure S10. Knockdown of NFκB and FOXM1 induces DNA damage, inhibits DNA damage response, and reduces cell survival. (A)** Western blot analyses demonstrate knockdown of NFκB1/p50 and FOXM1 (using siRNA transfection for 72 hours) and induction of γ-H2AX, reflecting resultant DNA double strand breaks. **(B)** Knockdown of NFκB1/p50 or FOXM1 is cytotoxic and reduces cell viability in SF188 cells. Cells were transfected with the indicated siRNAs and cell viability was determined 72 hours post transfection by CellTiter-Glo assay. Statistical analyses are indicated as \* $p < 0.05$ , \*\* $p < 0.01$ , \*\*\* $p < 0.001$ , \*\*\*\* $p < 0.0001$ . **(C)** Cell cycle profiles of SF188 cells after 72 hours of siRNA-mediated knockdown of NFκB1/p50 and RELB (NFκB) or FOXM1. **(D)** NFκB and FOXM1 knockdown decreases expression of DNA damage repair proteins. Western blot analysis was performed on SF188 extracts transfected with NFκB siRNA (cocktail containing NFκB1/p50 siRNA and RELB siRNA) or both NFκB siRNA and FOXM1 siRNA for 72 hours. **(E)** Exogenous expression of NFκB and FOXM1 in SF188 cells. Western blot analysis of doxycycline inducible SF188/HA-FOXM1b cells transfected with exogenous NFκB (Flag-RELB and Flag-p50) expression plasmids for 48 hours. FOXM1 expression was induced 24 hours post transfection as indicated.

**Supplementary Tables:**

**Supplementary Table S1. siRNA used in the study. All siRNAs were purchased from**

**Thermo Fisher Scientific. All sequences are provided in 5' to 3' orientation.**

| Target gene       | siRNA type | Sequence                          |
|-------------------|------------|-----------------------------------|
| <i>RAD51</i>      | Stealth    | GAGCUUGACAAACUACUUC               |
| <i>XRCC6/KU70</i> | Stealth    | GGAAGAGATAGTTTGATTT               |
| <i>Ligase IV</i>  | Stealth    | GCACAAAGATGGAGATGTA               |
| <i>NFKB1/p50</i>  | Stealth    | GCAGAUGGCCCAUACCUUCAAUAU          |
| <i>NFKB1/p50</i>  | Stealth    | GCACGAAUGACAGAGGCGUGUAUAA         |
| <i>RELB</i>       | Stealth    | GCCCGUCUAUGACAAGAAATT             |
| <i>FOXM1</i>      | Stealth    | CCCUGCCCAACAGGAGUCUAAUCA          |
| <i>FOXM1</i>      | Stealth    | GCCAUGAUACAAUUCGCCAUCAACA         |
| Scramble (Scr)    | Stealth    | Medium GC content from Invitrogen |

**Supplementary Table S2.** Primers used in real time PCR reactions to measure mRNA expression. All sequences are provided in 5' to 3' orientation.

| Target gene           | Orientation | Sequence                           |
|-----------------------|-------------|------------------------------------|
| <i>P21/CDKN1a</i>     | Forward     | GAGACTAAGGCAGAAGATGTAGAG           |
|                       | Reverse     | GCAGACCAGCATGACAGAT                |
| <i>KU80/XRCC5</i>     | Forward     | CAT GAA GAT GGA CCT ACA GCT AA     |
|                       | Reverse     | GGA AGT TTT CAG CAG GAT TCA C      |
| <i>KU70/XRCC6</i>     | Forward     | TCA GAG TGA AGA TGA GTT GAC AC     |
|                       | Reverse     | ATA GAA CAC CAC AGC CAA GAG        |
| <i>DNAPKcs/ PRKDC</i> | Forward     | TGC CAT TGA TCA CCT ATG CC         |
|                       | Reverse     | AAA GCC ACT TGA CCA GAT CC         |
| <i>XLFI/NHEJ1</i>     | Forward     | GAT TGA AGA CAG AAC CAT TTG AAG A  |
|                       | Reverse     | GTG ACT GCC ATA TAC AGA TCC TG     |
| <i>LIG4</i>           | Forward     | CAC AGA GGT AAC GGA GCT TG         |
|                       | Reverse     | TCT GTA TTC GTT CTA AAG TTG AAC AC |
| <i>XRCC4</i>          | Forward     | GCT GAT ACT CTC ATT GGT TGC        |
|                       | Reverse     | GGT GGA TTC TGC TTA TTT TTC TCT    |
| <i>POLQ</i>           | Forward     | TAT CTG CTG GAA CTT TTG CTG A      |
|                       | Reverse     | CTC ACA CCA TTT CTT TGA TGG A      |
| <i>RAD51</i>          | Forward     | CAG ACT ACT CGG GTC GAG GT         |
|                       | Reverse     | TCC ACT TGA GCT ACC ACC TG         |
| <i>BRCA1</i>          | Forward     | GGT GGT ACA TGC ACA GTT GC         |
|                       | Reverse     | ACT CTG GGG CTC TGT CTT CA         |
| <i>BRCA2</i>          | Forward     | GCC AAG TCA TGC CAC ACA TT         |
|                       | Reverse     | TGT GCC ATC TGG AGT GCT TT         |
| <i>FANCD2</i>         | Forward     | CAA ACA GAA TGA AGC CAG CA         |
|                       | Reverse     | CCA TGG TCA CAG CAC CAA TA         |
| <i>MRE11a</i>         | Forward     | TCC TAA AGT AAC CCA AGC CAT AC     |
|                       | Reverse     | TCC ACT ATA GTC CAC TCG CA         |
| <i>CHEK1</i>          | Forward     | AGT ACT GTA GTG GAG GAG AGC        |
|                       | Reverse     | CCA ATA CCA TGC AGA TAA ACC AC     |
| <i>WEE1</i>           | Forward     | TGG AGA TCA ATG GCA TGA AA         |
|                       | Reverse     | TAC CAG TGC CAT TGC TGA AG         |
| <i>NFKB1/p50</i>      | Forward     | CAG GAG ACG TGA AGA TGC TG         |

|                  |         |                                |
|------------------|---------|--------------------------------|
|                  | Reverse | AGT TGA GAA TGA AGG TGG ATG A  |
| <i>NFKB2/p52</i> | Forward | CCA TCC ATG ACA GCA AAT CTC    |
|                  | Reverse | AAC CGA ACC TCA ATG TCA TCT    |
| <i>RELA/p65</i>  | Forward | CGA GCT TGT AGG AAA GGA CTG    |
|                  | Reverse | TGA CTG ATA GCC TGC TCC AG     |
| <i>RELB</i>      | Forward | ATG AAT GTG GTG AGG ATC TGC    |
|                  | Reverse | AGC TCT GAT GTG TTT GTG GAT    |
| <i>c-REL</i>     | Forward | TTC CTC CTG TTG TCT CGA AC     |
|                  | Reverse | TCC TCC TCT GAC ACT TCC AC     |
| <i>FOXM1</i>     | Forward | GGA GGA AAA GGA GAA TTG TCA C  |
|                  | Reverse | GAT GGC GAA TTG TAT CAT GGC    |
| <i>FOXP3</i>     | Forward | CTA CTT CAA GTT CCA CAA CAT GC |
|                  | Reverse | CCA GTG GTA GAT CTC ATT GAG TG |
| <i>FOXO1</i>     | Forward | GGA TAA GGG TGA CAG CAA CAG    |
|                  | Reverse | TCC AGT TCC TTC ATT CTG CAC    |
| 18S              | Forward | GAG ACT CTG GCA TGC TAA CTA G  |
|                  | Reverse | GGA CAT CTA AGG GCA TCA CAG    |

**Supplementary Table S3.** Primers used for real time PCR following Chromatin Immunoprecipitation (ChIP-PCR). All sequences are provided in 5' to 3' orientation.

| Target gene                 | Orientation | Sequence                   |
|-----------------------------|-------------|----------------------------|
| <i>P21/CDKN1a promoter</i>  | Forward     | AGAAGAGGCTGGTGGCTATT       |
|                             | Reverse     | TGGGGTCTTTAGAGGTCTCC       |
| <i>P21/CDKN1a gene body</i> | Forward     | GCCGAAGTCAGTTCCTTGT        |
|                             | Reverse     | CTCTCACCTCCTCTGAGTGC       |
| <i>KU80/XRCC5</i>           | Forward     | CTA CGG CGG AAT GGA GAG AA |
|                             | Reverse     | CCC CGG AAC TCT GAG CAT    |
| <i>KU70/XRCC6</i>           | Forward     | CAG GTC GTA CAC GTA GAG CT |
|                             | Reverse     | GGG TAC GGG AAG GTC CAA G  |
| <i>XLFI/NHEJ1</i>           | Forward     | GGA GCA AAG AGG AAG GGA TA |
|                             | Reverse     | CTT CTC TGC ATC CAT TTT CC |
| <i>RAD51</i>                | Forward     | GAC GGC AAC TCG GTT AAG TC |
|                             | Reverse     | CGT CTG AGC CTA GGA GTT CG |
| <i>CHEK1</i>                | Forward     | ACA CCG GAT GCC ACT TCA TA |
|                             | Reverse     | GGG AGA GAT CCT GGC TGA AG |
| <i>WEE1</i>                 | Forward     | GGG TTC CCG CCA AAA TCG    |
|                             | Reverse     | GCA GCT CCG GGT TTG AAA A  |
| <i>Intergenic region</i>    | Forward     | CCA CCA TGC CCA GCC TAA TA |
|                             | Reverse     | AAT GTC TGG GCT CTC TCA CG |



**Supplementary Table S4.** Statistical analysis of significance for the pairwise comparison of 53BP1 and  $\gamma$ -H2AX and RAD51 and  $\gamma$ -H2AX staining for each time point presented in Figure 3B-C. One-way standard ANOVA was performed followed by Newman-Keuls test to correct for multiple comparisons. Post-hoc pairwise comparisons were performed only if ANOVA p-value is  $<0.05$ .

| <b>FIGURE 3B</b>                                                       | CUDC-907 | RT       | CUDC-907 + RT | KU70 siRNA + RT |
|------------------------------------------------------------------------|----------|----------|---------------|-----------------|
| 53BP1 foci analysis at 3 hour time-point (ANOVA $p<0.0001$ )           |          |          |               |                 |
| Control                                                                | 0.694094 | 0.000209 | 0.000210      | 0.000183        |
| CUDC-907                                                               |          | 0.000180 | 0.000183      | 0.000209        |
| RT                                                                     |          |          | 0.353156      | 1.000000        |
| CUDC-907 + RT                                                          |          |          |               | 0.178259        |
| 53BP1 foci analysis at 24 hour time-point (ANOVA $p=0.0005$ )          |          |          |               |                 |
| Control                                                                | 0.795071 | 0.295122 | 0.004459      | 0.002152        |
| CUDC-907                                                               |          | 0.216062 | 0.005323      | 0.003604        |
| RT-24hr                                                                |          |          | 0.001526      | 0.001229        |
| CUDC-907 + RT                                                          |          |          |               | 0.913279        |
| $\gamma$ -H2AX foci analysis at 3 hour time-point (ANOVA $p<0.0001$ )  |          |          |               |                 |
| Control                                                                | 0.001133 | 0.000180 | 0.000183      | 0.000209        |
| CUDC-907                                                               |          | 0.000209 | 0.000210      | 0.000183        |
| RT                                                                     |          |          | 0.934854      | 1.000000        |
| CUDC-907 + RT                                                          |          |          |               | 0.733696        |
| $\gamma$ -H2AX foci analysis at 24 hour time-point (ANOVA $p<0.0036$ ) |          |          |               |                 |
| Control                                                                | 0.795071 | 0.295122 | 0.004459      | 0.002152        |
| CUDC-907                                                               |          | 0.216062 | 0.005323      | 0.003604        |
| RT-24hr                                                                |          |          | 0.001526      | 0.001229        |
| CUDC-907 + RT                                                          |          |          |               | 0.913279        |

| <b>FIGURE 3C</b>                                                                                     | CUDC-907 | RT       | CUDC-907 + RT | KU70 siRNA + RT |
|------------------------------------------------------------------------------------------------------|----------|----------|---------------|-----------------|
| RAD51 foci analysis at 3 hour time-point (ANOVA p<0.0001)                                            |          |          |               |                 |
| Control                                                                                              | 0.122120 | 0.000323 | 0.193697      | 0.070444        |
| CUDC-907                                                                                             |          | 0.000201 | 0.030471      | 0.009208        |
| RT                                                                                                   |          |          | 0.000512      | 0.000736        |
| CUDC-907 + RT                                                                                        |          |          |               | 0.273001        |
| RAD51 foci analysis at 24 hour time-point (ANOVA p=0.1357). No post-hoc Newman-Keuls test performed. |          |          |               |                 |
| $\gamma$ -H2AX foci analysis at 3 hour time-point (ANOVA p<0.0001)                                   |          |          |               |                 |
| Control                                                                                              | 0.065836 | 0.000180 | 0.000209      | 0.000183        |
| CUDC-907                                                                                             |          | 0.000209 | 0.000183      | 0.000210        |
| RT                                                                                                   |          |          | 0.897140      | 0.205458        |
| CUDC-907 + RT                                                                                        |          |          |               | 0.118281        |
| $\gamma$ -H2AX foci analysis at 24 hour time-point (ANOVA p<0.0001)                                  |          |          |               |                 |
| Control                                                                                              | 0.180807 | 0.282434 | 0.000481      | 0.010847        |
| CUDC-907                                                                                             |          | 0.861042 | 0.001363      | 0.056763        |
| RT-24hr                                                                                              |          |          | 0.000996      | 0.032293        |
| CUDC-907 + RT                                                                                        |          |          |               | 0.013171        |

**Supplementary Table S5.** Statistical analysis of significance for the pairwise comparison of mRNA expression data presented in Figure 4A. One-way standard ANOVA was performed followed by Newman-Keuls test to correct for multiple comparisons.

|                      | Control vs CUDC-907                                              | Controls vs RT | Controls vs CUDC-907 + RT | CUDC-907 vs RT | CUDC-907 vs CUDC-907 + RT | RT vs CUDC-907 + RT |
|----------------------|------------------------------------------------------------------|----------------|---------------------------|----------------|---------------------------|---------------------|
| <i>KU80/XRCC5</i>    | 0.008904                                                         | 0.000226       | 0.015779                  | 0.000231       | 0.336719                  | 0.000201            |
| <i>KU70/XRCC6</i>    | 0.003638                                                         | 0.012599       | 0.017708                  | 0.000391       | 0.109836                  | 0.000840            |
| <i>DNAPKcs/PRDKC</i> | 0.081448                                                         | 0.000223       | 0.377414                  | 0.000231       | 0.150209                  | 0.000201            |
| <i>XLF/NHEJ1</i>     | 0.000579                                                         | 0.205049       | 0.000397                  | 0.000381       | 0.804905                  | 0.000310            |
| <i>LIG4</i>          | 0.008980                                                         | 0.245880       | 0.000484                  | 0.022607       | 0.008296                  | 0.000759            |
| <i>XRCC4</i>         | 0.030617                                                         | 0.800071       | 0.658138                  | 0.045590       | 0.036008                  | 0.857300            |
| <i>POLQ</i>          | 0.178890                                                         | 0.080357       | 0.343108                  | 0.017131       | 0.358874                  | 0.040072            |
| <i>RAD51</i>         | 0.000201                                                         | 0.061237       | 0.000223                  | 0.000231       | 0.011763                  | 0.000201            |
| <i>BRCA1</i>         | 0.005994                                                         | 0.001571       | 0.011463                  | 0.000276       | 0.299581                  | 0.000287            |
| <i>BRCA2</i>         | Tests not performed as ANOVA did not yield a significant p value |                |                           |                |                           |                     |
| <i>FANCD2</i>        | 0.000215                                                         | 0.000223       | 0.000228                  | 0.000231       | 0.771589                  | 0.000201            |
| <i>MRE11a</i>        | 0.138000                                                         | 0.005720       | 0.105721                  | 0.030594       | 0.504092                  | 0.037318            |
| <i>CHEK1</i>         | 0.000201                                                         | 0.000369       | 0.000223                  | 0.000231       | 0.7                       | 0.000201            |
| <i>WEE1</i>          | 0.000201                                                         | 0.000223       | 0.000223                  | 0.000231       | 0.731608                  | 0.000201            |

**Supplementary Table S6.** P value for all pairwise comparison on expression data presented in Figure 5A determined by one-way standard ANOVA followed by Newman-Keuls test to correct for multiple comparisons.

|                  | Control vs CUDC-907 | Controls vs RT | Controls vs CUDC-907 + RT | CUDC-907 vs RT | CUDC-907 vs CUDC-907 + RT | RT vs CUDC-907 + RT |
|------------------|---------------------|----------------|---------------------------|----------------|---------------------------|---------------------|
| <i>NFKB1/p50</i> | 0.000201            | 0.000223       | 0.000223                  | 0.000231       | 0.923065                  | 0.000201            |
| <i>NFKB2/p52</i> | 0.005923            | 0.004392       | 0.000231                  | 0.396586       | 0.000201                  | 0.000223            |
| <i>RELA/p65</i>  | 0.051491            | 0.928756       | 0.056199                  | 0.025364       | 0.785567                  | 0.039056            |
| <i>RELB</i>      | 0.112100            | 0.000201       | 0.030170                  | 0.000231       | 0.005717                  | 0.000223            |
| <i>c-REL</i>     | 0.039884            | 0.011862       | 0.079475                  | 0.001254       | 0.344881                  | 0.002089            |
| <i>FOXMI</i>     | 0.000201            | 0.046310       | 0.000223                  | 0.000231       | 0.555778                  | 0.000201            |

**Supplementary Table S7.** Results of the one-way ANOVA followed by Newman-Keuls test on the chromatin immunoprecipitation data presented in Figure 5F.

Anti-RELB ChIP-PCR

|                   | Control vs CUDC-907                                              | Controls vs RT | Controls vs CUDC-907 + RT | CUDC-907 vs RT | CUDC-907 vs CUDC-907 + RT | RT vs CUDC-907 + RT |
|-------------------|------------------------------------------------------------------|----------------|---------------------------|----------------|---------------------------|---------------------|
| <i>KU70</i>       | 0.132556                                                         | 0.011062       | 0.064069                  | 0.002731       | 0.966372                  | 0.001704            |
| <i>KU80</i>       | 0.018026                                                         | 0.000295       | 0.011739                  | 0.000209       | 0.392243                  | 0.000237            |
| <i>XLF</i>        | 0.689566                                                         | 0.000229       | 0.541048                  | 0.000246       | 0.84456                   | 0.000211            |
| <i>RAD51</i>      | 0.312273                                                         | 0.000269       | 0.282482                  | 0.00028        | 0.688063                  | 0.000249            |
| <i>WEE1</i>       | 0.007364                                                         | 0.014558       | 0.009311                  | 0.000573       | 0.652798                  | 0.000617            |
| <i>CHEK1</i>      | 0.029012                                                         | 0.019634       | 0.078409                  | 0.001401       | 0.259441                  | 0.003032            |
| Intergenic region | Tests not performed as ANOVA did not yield a significant p value |                |                           |                |                           |                     |

Anti-FOXM1 ChIP-PCR

|                   | Control vs CUDC-907 | Controls vs RT | Controls vs CUDC-907 + RT | CUDC-907 vs RT | CUDC-907 vs CUDC-907 + RT | RT vs CUDC-907 + RT |
|-------------------|---------------------|----------------|---------------------------|----------------|---------------------------|---------------------|
| <i>KU70</i>       | 0.005799            | 0.000223       | 0.007914                  | 0.000231       | 0.405032                  | 0.000201            |
| <i>KU80</i>       | 0.299326            | 0.000223       | 0.20442                   | 0.000231       | 0.831586                  | 0.000201            |
| <i>XLF</i>        | 0.869152            | 0.000223       | 0.634402                  | 0.000231       | 0.988815                  | 0.000201            |
| <i>RAD51</i>      | 0.463756            | 0.000223       | 0.381747                  | 0.000231       | 0.760262                  | 0.000201            |
| <i>WEE1</i>       | 0.005803            | 0.000223       | 0.000203                  | 0.000201       | 0.000278                  | 0.000231            |
| <i>CHEK1</i>      | 0.656925            | 0.000223       | 0.457737                  | 0.000231       | 0.909969                  | 0.000201            |
| Intergenic region | 0.405925            | 0.285597       | 0.032365                  | 0.468911       | 0.069162                  | 0.097431            |

**Supplementary Table S8.** The pairwise comparison p value for the mRNA expression presented in Figure 6B derived by one-way ANOVA followed by Newman-Keuls test.

|                   | Scr vs NFκB +<br>FOXM1 siRNA | Scr vs NFκB siRNA | NFκB siRNA vs NFκB<br>+FOXM1 siRNA |
|-------------------|------------------------------|-------------------|------------------------------------|
| <i>XRCC6/KU70</i> | 0.002088                     | 0.029342          | 0.014974                           |
| <i>XRCC5/KU80</i> | 0.000524                     | 0.020441          | 0.001799                           |
| <i>XLF</i>        | 0.000227                     | 0.000252          | 0.000235                           |
| <i>RAD51</i>      | 0.002088                     | 0.029342          | 0.014974                           |
| <i>WEE1</i>       | 0.023015                     | 0.025229          | 0.478784                           |
| <i>CHEK1</i>      | 0.000235                     | 0.816661          | 0.000227                           |
| <i>XRCC4</i>      | 0.018096                     | 0.370299          | 0.025237                           |
| <i>NFKB1/p50</i>  | 0.000299                     | 0.002268          | 0.001819                           |
| <i>RELB</i>       | 0.000227                     | 0.000571          | 0.000235                           |
| <i>FOXM1</i>      | 0.000227                     | 0.026063          | 0.000236                           |
